# Supplementary material for: The application of factorial surveys to study recruiters’ hiring intentions: comparing designs based on hypothetical and real vacancies
Source: Springer Nature journal article supplement (doi:10.1007/s11135-020-01012-7), 2020-08-04
Supplement: MOESM1 [file 18248740]

## **Online Appendix**

### **The application of factorial surveys to study recruiters' hiring intentions: Comparing designs based on hypothetical and real vacancies**

Tamara Gutfleisch, Robin Samuel, Stefan Sacchi

#### **1. Introduction**

This online Appendix provides additional information on our sampling process. We also provide additional robustness checks regarding our experimental design.

## 2. Selection of occupations

Table A1 shows an overview of all occupations targeted in the present study and the respective ISCO-08 codes.<sup>1</sup> As mentioned, we were only able to consider the data from catering and information technology (IT) in our analyses. The ISCO categories were used as a reference point during the sampling process for the selection of real vacancies as well as for the filtering of respondents in the hypothetical vacancy sample.

**Table A1** Overview of ISCO categories

| <b>Occupation</b>                     | <b>ISCO-08 code</b> |
|---------------------------------------|---------------------|
| <i>Manufacturing</i>                  |                     |
| Industrial mechanics                  | 7233                |
| <i>Finance</i>                        |                     |
| Securities and financial brokers      | 3311                |
| Insurance representatives             | 3321                |
| <i>Nursing</i>                        |                     |
| Professional nurse                    | 3221                |
| Health care assistants                | 5321                |
| Home-based personal care workers      | 5322                |
| Child care workers                    | 5311                |
| <i>Information technology</i>         |                     |
| System analysts                       | 2511                |
| System developers                     | 2512                |
| Web and multimedia developers         | 2513                |
| Applications programmers              | 2514                |
| Database designers and administrators | 2521                |
| System administrators                 | 2522                |
| Computer network professionals        | 2523                |
| <i>Catering</i>                       |                     |
| Waiter/Waitress                       | 5131                |

## 3. Sampling of real vacancies

Table A2 provides the list of online job portals and company websites used to collect job advertisements. Within each occupational category, we considered only entry-level jobs located in Luxembourg, excluding vacancies that referred to senior positions, required higher-level educational degrees (Master degree or higher), required more than five years of work experience, or were located in another country. Besides generic job portals, we also searched on occupation-

<sup>1</sup> We focused on similar occupations as NEGOTIATE (2020).

specific job portals in some occupations, if available. We selected job portals and websites that provided the most job advertisements matching our criteria during our pilot study to make the collection of vacancies as efficient as possible.

**Table A2** Overview of job portals and company websites

| <b>Name of job portals</b>    | <b>Link to job portals</b>                                                                                                      |
|-------------------------------|---------------------------------------------------------------------------------------------------------------------------------|
| <b>Generic job portals</b>    |                                                                                                                                 |
| Monster                       | <a href="http://www.monster.lu">http://www.monster.lu</a>                                                                       |
| Jobs                          | <a href="http://www.jobs.lu">http://www.jobs.lu</a>                                                                             |
| Jobfinder                     | <a href="http://www.jobfinder.lu">http://www.jobfinder.lu</a>                                                                   |
| Moovijob                      | <a href="http://www.moovijob.com">http://www.moovijob.com</a>                                                                   |
| EURES                         | <a href="https://ec.europa.eu/eures/public/en/homepage">https://ec.europa.eu/eures/public/en/homepage</a>                       |
| Indeed                        | <a href="http://www.indeed.lu">http://www.indeed.lu</a>                                                                         |
| JobStreet                     | <a href="https://www.jobstreet.lu/en-GB">https://www.jobstreet.lu/en-GB</a>                                                     |
| <b>Nursing</b>                |                                                                                                                                 |
|                               | <a href="https://www.randstad.lu/emplois/">https://www.randstad.lu/emplois/</a>                                                 |
|                               | <a href="https://www.chl.lu/fr/job/professions-soignantes">https://www.chl.lu/fr/job/professions-soignantes</a>                 |
|                               | <a href="https://jobs.servior.lu/de">https://jobs.servior.lu/de</a>                                                             |
|                               | <a href="http://www.shd.lu/ge/Jobs/Job-Portal">http://www.shd.lu/ge/Jobs/Job-Portal</a>                                         |
|                               | <a href="https://www.elisabeth.lu/offres-emploi/">https://www.elisabeth.lu/offres-emploi/</a>                                   |
|                               | <a href="http://www.fgfc.lu/online/www/nav-content/FRE/index.html">http://www.fgfc.lu/online/www/nav-content/FRE/index.html</a> |
|                               | <a href="http://recrutement.croix-rouge.lu/">http://recrutement.croix-rouge.lu/</a>                                             |
|                               | <a href="http://www.fal.lu/stiftung/jobs/">http://www.fal.lu/stiftung/jobs/</a>                                                 |
|                               | <a href="http://www.cjf.lu/emploi.html">http://www.cjf.lu/emploi.html</a>                                                       |
|                               | <a href="https://www.apemh.lu/">https://www.apemh.lu/</a>                                                                       |
|                               | <a href="http://youthhostels.lu/de">http://youthhostels.lu/de</a>                                                               |
| <b>Information technology</b> |                                                                                                                                 |
| ICT jobs                      | <a href="https://www.ictjob.lu/">https://www.ictjob.lu/</a>                                                                     |
| <b>Finance</b>                |                                                                                                                                 |
| Efinancialcareers             | <a href="https://www.efinancialcareers.lu/">https://www.efinancialcareers.lu/</a>                                               |
| <b>Catering</b>               |                                                                                                                                 |
| Horeca                        | <a href="https://www.horesca.lu/fr/jobs-list">https://www.horesca.lu/fr/jobs-list</a>                                           |
| Hotellerie-Restauration       | <a href="https://www.lhotellerie-restauration.fr/emploi/">https://www.lhotellerie-restauration.fr/emploi/</a>                   |
| Menu Lux                      | <a href="http://menu.lu/fr/offres-d-emploi">http://menu.lu/fr/offres-d-emploi</a>                                               |
| Lux Bazar                     | <a href="http://www.luxbazar.lu/Emploi.htm">http://www.luxbazar.lu/Emploi.htm</a>                                               |

To facilitate the search for vacancies that would match our pre-defined criteria, we used a set of keywords on each website. The keywords corresponded to generic job titles that are most common in Luxembourg regarding the type of jobs of interest. Since Luxembourg is a multilingual country, the keywords were used in both German and French and, in some cases, in English (e.g., regarding

jobs in information technology and finance). Most of the job portals offer pre-defined search categories that matched our occupations of interest, which were also used to make the collection of vacancies more efficient.

For the collection of vacancies in IT, a computer program was used to sample job advertisements from the website “indeed.lu”, one of the largest online job portals. The tool collected information on job title, company name, location of the job, and the direct link to the job advertisement and saved it in a data set.<sup>2</sup> The recruiter details (such as email addresses and names) were still added manually and by calling the companies and asking for the respective information. Standardized scripts were used for the phone calls.

#### **4. Sampling strategy: hypothetical vacancies**

As stated in our manuscript, we sampled additional respondents from publicly available lists of companies within each occupation. We used different sources (e.g., yellow pages) and strategies in each occupation. Since we focus on jobs in catering and IT in our analyses, we restrict the following description to these two occupations.

To find companies and recruiters in the field of catering and IT, we mostly used the website *kompas.com*, which offers a registry of different firms in different countries including Luxembourg. Regarding catering, we collected companies within the category “Restaurants and Bars”. Regarding IT companies, we searched within the category “Information technology (IT) and Internet”. We used a web-scraping tool to collect information on company names, telephone numbers, and, if available, email addresses of persons most likely involved recruitment (e.g., business owners, managing directors).<sup>3</sup> The information was stored in a data set. To collect information on companies in catering, we additionally referred to *editus.lu*, a business directory for Luxembourg (similar to the yellow pages), where we manually collected information on companies. In a second step, we called the respective companies to gather missing information on email addresses and names of persons actively involved in recruitment for the occupations of interest in our study. Again, standardized scripts were used for the phone calls.

---

<sup>2</sup> This was done using the free software R. The R script is available on request.

<sup>3</sup> Again, this was done using the software R.

## **5. Robustness checks: experimental design**

Table A3 (catering) and A4 (IT) show Pearson's correlation coefficients between our vignette variables (as dummies for each category) and key observed respondent characteristics (as dummies for each category). Table A5 shows the correlation between the error term  $u_j$  and the observed control variables obtained from fixed-effects regressions in each occupation. If the randomization of vignettes to respondents was successful, the overall correlation between the observed variables in the model and the error term  $u_j$  should be close to zero.

**Table A3:** Correlations between vignette variables and key observed respondent characteristics (catering)

|                                | Vignette variables |        |        |        |        |        |        |        |        |        |
|--------------------------------|--------------------|--------|--------|--------|--------|--------|--------|--------|--------|--------|
|                                | 1                  | 2      | 3      | 4      | 5      | 6      | 7      | 8      | 9      | 10     |
| Respondents                    |                    |        |        |        |        |        |        |        |        |        |
| Female (1/0)                   | 0.000              | -0.000 | 0.000  | 0.000  | 0.000  | 0.000  | 0.000  | 0.000  | 0.000  | 0.000  |
| Luxembourgish citizenship      | 0.000              | -0.000 | 0.000  | 0.000  | 0.000  | 0.000  | 0.000  | 0.000  | 0.000  | 0.000  |
| Age                            | 0.000              | -0.000 | -0.000 | -0.000 | -0.000 | -0.000 | -0.000 | -0.000 | -0.000 | -0.000 |
| Highest educational level      |                    |        |        |        |        |        |        |        |        |        |
| Compulsory school              | 0.000              | 0.000  | 0.000  | 0.000  | -0.000 | -0.000 | -0.000 | -0.000 | -0.000 | -0.000 |
| Vocational training            | 0.000              | -0.000 | -0.000 | -0.000 | -0.000 | -0.000 | -0.000 | -0.000 | -0.000 | -0.000 |
| University entry qualification | 0.000              | 0.000  | 0.000  | 0.000  | -0.000 | 0.000  | -0.000 | -0.000 | -0.000 | -0.000 |
| University degree              | 0.000              | 0.000  | 0.000  | 0.000  | 0.000  | 0.000  | 0.000  | 0.000  | 0.000  | 0.000  |
| Other                          | 0.000              | 0.000  | 0.000  | 0.000  | 0.000  | 0.000  | 0.000  | 0.000  | 0.000  | 0.000  |

Pairwise correlations between vignette variables (as dummies for each category) and observed respondent characteristics (as dummies for each category).

Pearson's correlation coefficient.

*Vignette variables:* 1=Female, 2=No unemployment, 3=Unemployed after graduation, 4=Currently unemployed, 5=Luxembourgish native, 6=Portuguese foreigner, 7=Luxembourgish-Portuguese foreigner, 8=French border worker, 9=French foreigner, 10=German border worker.

**Table A4:** Correlations between vignette variables and key observed respondent characteristics (IT)

|                                | Vignette Variables |        |        |        |        |        |        |        |        |        |
|--------------------------------|--------------------|--------|--------|--------|--------|--------|--------|--------|--------|--------|
|                                | 1                  | 2      | 3      | 4      | 5      | 6      | 7      | 8      | 9      | 10     |
| Respondents                    |                    |        |        |        |        |        |        |        |        |        |
| Female (1/0)                   | 0.000              | 0.000  | -0.000 | 0.000  | 0.000  | 0.000  | 0.000  | 0.000  | 0.000  | 0.000  |
| Luxembourgish citizenship      | 0.000              | -0.000 | -0.000 | -0.000 | -0.000 | -0.000 | -0.000 | -0.000 | -0.000 | -0.000 |
| Age                            | 0.000              | -0.000 | -0.000 | -0.000 | -0.000 | -0.000 | -0.000 | 0.000  | -0.000 | -0.000 |
| Highest educational level      |                    |        |        |        |        |        |        |        |        |        |
| Vocational training            | 0.000              | 0.000  | 0.000  | 0.000  | -0.000 | -0.000 | -0.000 | -0.000 | -0.000 | -0.000 |
| University entry qualification | 0.000              | 0.000  | 0.000  | 0.000  | 0.000  | 0.000  | 0.000  | 0.000  | 0.000  | 0.000  |
| University degree              | 0.000              | -0.000 | -0.000 | -0.000 | -0.000 | -0.000 | -0.000 | -0.000 | -0.000 | 0.000  |
| Other                          | 0.000              | 0.000  | 0.000  | 0.000  | -0.000 | -0.000 | -0.000 | -0.000 | -0.000 | -0.000 |

Pairwise correlations between vignette variables (as dummies for each category) and observed respondent characteristics (as dummies for each category).

Pearson's correlation coefficient.

*Vignette variables:* 1=Female, 2=No unemployment, 3=Unemployed after graduation, 4=Currently unemployed, 5=Luxembourgish native, 6=Portuguese foreigner, 7=Luxembourgish-Portuguese foreigner, 8=French border worker, 9=French foreigner, 10=German border worker.

**Table A5:** Correlation between the error term  $u_j$  and control variables in fixed effects models

|                        | <b>Correlation (<math>u_j, X</math>)</b> |
|------------------------|------------------------------------------|
| Catering               | -0.000                                   |
| Information technology | 0.000                                    |

Note: A fixed-effects model was estimated in each occupation only including the vignette variables as predictors to test for the influence of unobserved respondent characteristics

## References

NEGOTIATE (2020). *NEGOTIATE Employer Survey. Scientific Use File. Data Documentation.*  
Oslo: OsloMet.
